## Correction

# Correction: MicroRNA-221 promotes cisplatin resistance in osteosarcoma cells by targeting PPP2R2A

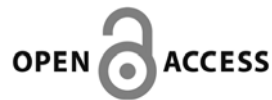

The authors of the original article “MicroRNA-221 promotes cisplatin resistance in osteosarcoma cells by targeting PPP2R2A” (*Biosci Rep* (2019) 39(7), <https://doi.org/10.1042/BSR20190198>) would like to correct Figure 2D, as they had placed an incorrect image during the figure build of their submitted article. A revised version of Figure 2 is present in this Correction. The authors express their sincere apologies for any inconvenience that this error has caused to the readers.

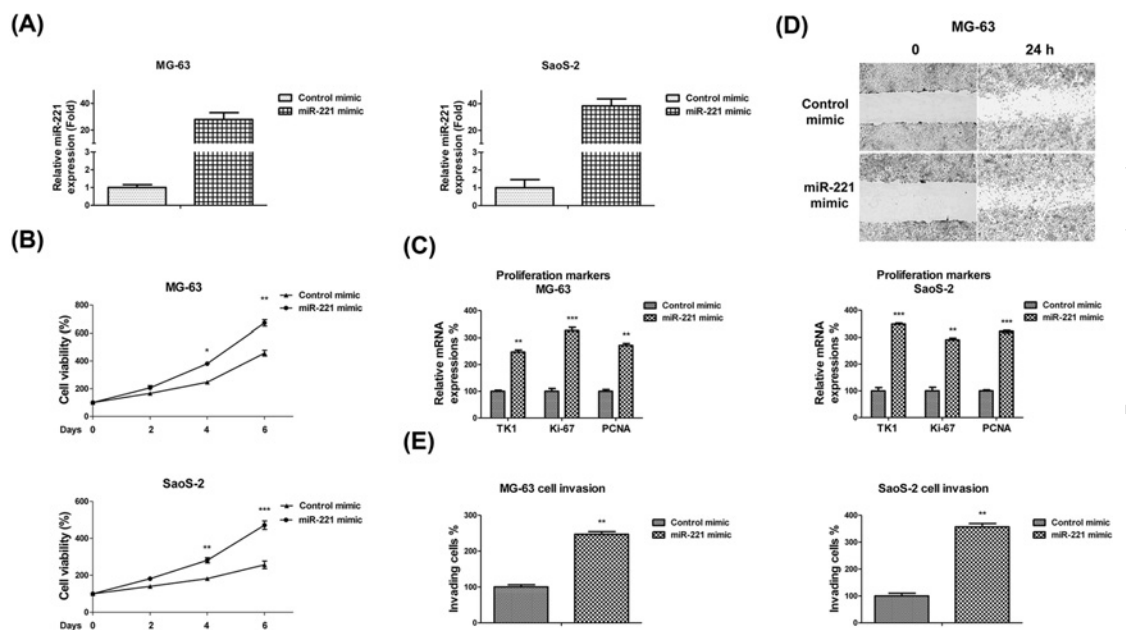

**Figure 2.** miR-221 overexpression promotes OS cell proliferation, migration, and invasion

(A) miR-221 or control mimics were transfected into MG-63 (left) and SaoS-2 (right) cells at 50 nM concentrations for 48 h. miR-221 expressions were analyzed using qRT-PCR and normalized to RNU6. (B) MG-63 (upper) and SaoS-2 (lower) cells were transfected with 50 nM of control or miR-221 mimics for 48 h, followed by the measurements of cell proliferation via MTT assay and (C) measurements of the cell proliferation markers, TK1, Ki-67, and PCNA, using qRT-PCR. (D) MG-63 cells were transfected with 50 nM of control or miR-221 mimics for 48 h. Cell migration was measured via wound healing assay and (E) cell invasion was measured via transwell assay. Data are presented as mean  $\pm$  SD. Columns, mean of three independent experiments; bars, SD; \*,  $P < 0.05$ ; \*\*,  $P < 0.01$ ; \*\*\*,  $P < 0.001$ .
